# Supplementary material
Source: ML conference proceedings conference paper supplement (https://proceedings.mlr.press/v89/lapanowski19a.html)
Supplement: Supplementary file [file lapanowski19a-supp.pdf]

---

# Supplementary Material to “Sparse Feature Selection in Kernel Discriminant Analysis via Optimal Scoring”

---

Alexander F. Lapanowski

Irina Gaynanova

Texas A&M University

{alapanow, irinag}@stat.tamu.edu

## Abstract

This supplement contains the derivation of projection formula (6), proofs of Theorems 1 and 2, as well as proofs of supplementary Theorems and Lemmas.

### S1 Derivation of projection formula (6)

*Proof.* Since  $\hat{f} = \sum_{i=1}^n \hat{\alpha}_i [\Phi(x_i) - \bar{\Phi}]$ ,

$$\begin{aligned}
 \langle \Phi(x) - \bar{\Phi}, \hat{f} \rangle_{\mathcal{H}} &= \left\langle \Phi(x) - \bar{\Phi}, \sum_{i=1}^n \hat{\alpha}_i [\Phi(x_i) - \bar{\Phi}] \right\rangle_{\mathcal{H}} \\
 &= \sum_{i=1}^n \hat{\alpha}_i \langle \Phi(x) - \bar{\Phi}, \Phi(x_i) - \bar{\Phi} \rangle_{\mathcal{H}} \\
 &= \sum_{i=1}^n \hat{\alpha}_i \langle \Phi(x), \Phi(x_i) \rangle_{\mathcal{H}} - \sum_{i=1}^n \hat{\alpha}_i \langle \Phi(x), \bar{\Phi} \rangle_{\mathcal{H}} - \sum_{i=1}^n \hat{\alpha}_i \langle \bar{\Phi}, \Phi(x_i) \rangle_{\mathcal{H}} + \sum_{i=1}^n \hat{\alpha}_i \langle \bar{\Phi}, \bar{\Phi} \rangle_{\mathcal{H}} \\
 &= \sum_{i=1}^n \hat{\alpha}_i k(x, x_i) - (\mathbf{1}^\top \hat{\alpha}) \frac{1}{n} \sum_{i=1}^n k(x, x_i) - \frac{1}{n} \sum_{i=1}^n \sum_{j=1}^n \hat{\alpha}_i k(x_j, x_i) + (\mathbf{1}^\top \hat{\alpha}) \frac{1}{n^2} \sum_{i=1}^n \sum_{j=1}^n k(x_i, x_j).
 \end{aligned}$$

Let  $K(X, x) := (k(x_1, x) \ \cdots \ k(x_n, x))^\top$ . Then from the above display

$$\begin{aligned}
 \langle \Phi(x) - \bar{\Phi}, \hat{f} \rangle_{\mathcal{H}} &= K(X, x)^\top \hat{\alpha} - n^{-1} K(X, x)^\top \mathbf{1} \mathbf{1}^\top \hat{\alpha} - n^{-1} \mathbf{1}^\top K \hat{\alpha} + \frac{1}{n^2} \mathbf{1}^\top K \mathbf{1} (\mathbf{1}^\top \hat{\alpha}) \\
 &= K(X, x)^\top C \hat{\alpha} - \frac{1}{n} \mathbf{1}^\top K C \hat{\alpha} \\
 &= (K(X, x)^\top - \frac{1}{n} \mathbf{1}^\top K) C \hat{\alpha},
 \end{aligned}$$

where  $C = I - n^{-1} \mathbf{1} \mathbf{1}^\top$  is the centering matrix. □

## S2 Technical Proofs

In this section we prove the results stated within the main text. We use  $C, C_1, C_2, \dots$  to denote absolute positive constants that do not depend on the sample size  $n$  but which may depend on  $\|\theta^*\|_\infty, \kappa$ , or  $\tau$ . Their values may change from line to line. The dependence between the main Theorems and supplementary results is depicted below.

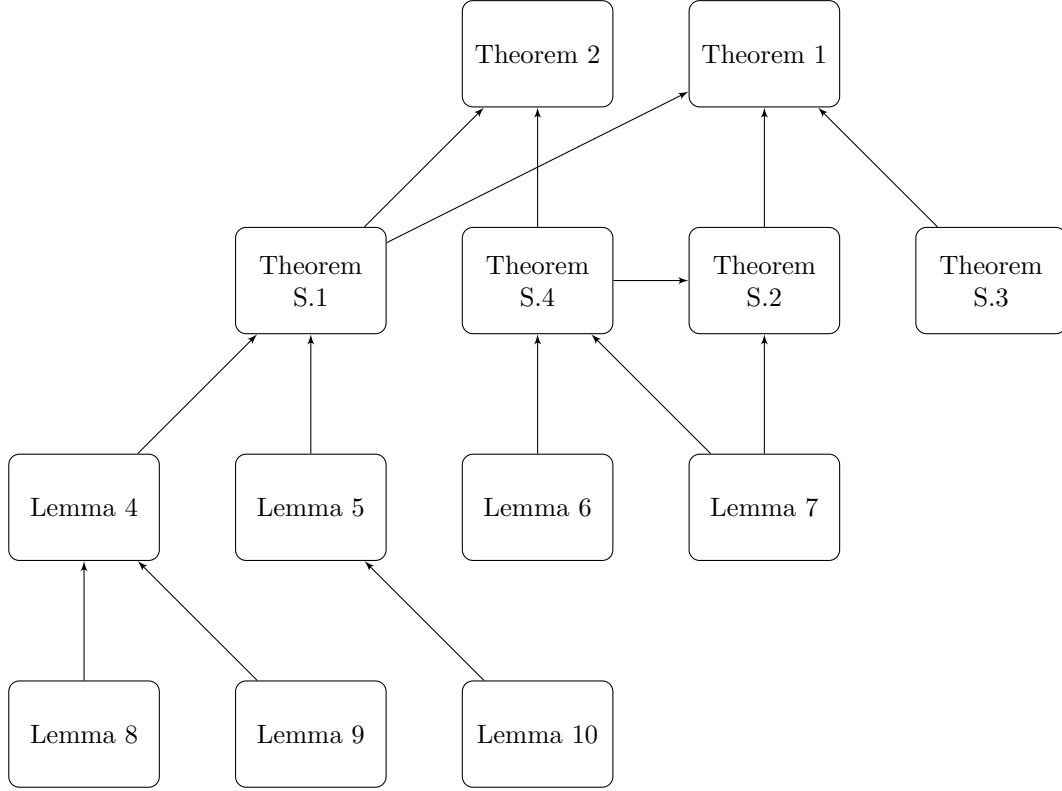

### S.2.1 Proofs of Theorems 1 and 2

*Proof of Theorem 1.* Consider

$$R(\hat{f}, \hat{\beta}) - R(f^*, \beta^*) = \underbrace{R(\hat{f}, \hat{\beta}) - \tilde{R}_{\text{emp}}(\hat{f}, \hat{\beta})}_{I_1} + \underbrace{\tilde{R}_{\text{emp}}(\hat{f}, \hat{\beta}) - \tilde{R}_{\text{emp}}(\tilde{f}, \tilde{\beta})}_{I_2} + \underbrace{\tilde{R}_{\text{emp}}(\tilde{f}, \tilde{\beta}) - R(f^*, \beta^*)}_{I_3}.$$

By the union bound and de Morgan’s law,

$$\mathbb{P}\left(R(\hat{f}, \hat{\beta}) - R(f^*, \beta^*) > \varepsilon\right) \leq \mathbb{P}\left(I_1 > \frac{\varepsilon}{3}\right) + \mathbb{P}\left(I_2 > \frac{\varepsilon}{3}\right) + \mathbb{P}\left(I_3 > \frac{\varepsilon}{3}\right).$$

Applying Theorems S.1, S.2 and S.3 to  $I_1, I_2$  and  $I_3$  correspondingly, there exist constants  $C, C_i > 0$  such that

$$\begin{aligned} & \mathbb{P}\left(R(\hat{f}, \hat{\beta}) - R(f^*, \beta^*) > \varepsilon\right) \\ & \leq 2\mathcal{N}_\varepsilon \exp\left(-\frac{n\varepsilon^2}{128(\|\theta^*\|_\infty + \kappa\tau)^4}\right) + C_2 \exp\left(-\frac{C_3 n\varepsilon^2}{1 + (\kappa\tau)^2}\right) + 2 \exp\left(-\frac{n\varepsilon^2}{16(\|\theta^*\|_\infty + \kappa\tau)^4}\right) \\ & \leq C_4 \mathcal{N}_\varepsilon \exp\left(-\frac{C_5 n\varepsilon^2}{(\|\theta^*\|_\infty + \kappa\tau)^4}\right), \end{aligned}$$

where  $\mathcal{N}_\varepsilon = \{1 + 2(\|\theta^*\|_\infty + \kappa\tau)/\varepsilon\} \exp(C\tau^2\varepsilon^{-2})$ . This concludes the proof of Theorem 1.

□

*Proof of Theorem 2.* Consider

$$R(\widehat{f}, \widehat{\beta}) - R_{\text{emp}}(\widehat{f}) = \underbrace{R(\widehat{f}, \widehat{\beta}) - \widetilde{R}_{\text{emp}}(\widehat{f}, \widehat{\beta})}_{I_1} + \underbrace{\widetilde{R}_{\text{emp}}(\widehat{f}, \widehat{\beta}) - R_{\text{emp}}(\widehat{f})}_{I_2}.$$

By the union bound and de Morgan's law,

$$\mathbb{P}\left(R(\widehat{f}, \widehat{\beta}) - R_{\text{emp}}(\widehat{f}) > \varepsilon\right) \leq \mathbb{P}\left(I_1 > \frac{\varepsilon}{2}\right) + \mathbb{P}\left(I_2 > \frac{\varepsilon}{2}\right).$$

Applying Theorem S.1 for  $I_1$  and Theorem S.4 for  $I_2$ , there exist constants  $C_i > 0$  such that

$$\begin{aligned} \mathbb{P}\left(R(\widehat{f}, \widehat{\beta}) - R_{\text{emp}}(\widehat{f}) > \varepsilon\right) &\leq 2\mathcal{N}_\varepsilon \exp\left(-\frac{n\varepsilon^2}{128(\|\theta^*\|_\infty + \kappa\tau)^4}\right) + C_3 \exp\left(-\frac{C_4 n\varepsilon^2}{1 + (\kappa\tau)^2}\right) \\ &\leq C_5 \mathcal{N}_\varepsilon \exp\left(-\frac{C_6 n\varepsilon^2}{(\|\theta^*\|_\infty + \kappa\tau)^4}\right), \end{aligned}$$

where  $\mathcal{N}_\varepsilon = \{1 + 2(\|\theta^*\|_\infty + \kappa\tau)/\varepsilon\} \exp(C_1 \tau^2 \varepsilon^{-2})$ . This concludes the proof of Theorem 2.  $\square$

## S.2.2 Supplementary Theorems

**Theorem S.1.** *Under Assumptions 1-3, there exists a constant  $C_2 > 0$  such that for all  $\varepsilon > 0$ ,*

$$\mathbb{P}\left(\sup_{f \in \mathcal{H}_\tau, \beta \in I_\tau} \{R(f, \beta) - \widetilde{R}_{\text{emp}}(f, \beta)\} > \varepsilon\right) \leq 2\mathcal{N}_\varepsilon \exp\left(-\frac{n\varepsilon^2}{128(\|\theta^*\|_\infty + \kappa\tau)^4}\right),$$

where  $\mathcal{N}_\varepsilon = \{1 + 2(\|\theta^*\|_\infty + \kappa\tau)/\varepsilon\} \exp(C_2 \tau^2 \varepsilon^{-2})$ .

**Theorem S.2.** *Let  $\widehat{\beta} = -\langle \overline{\Phi}, \widehat{f} \rangle_{\mathcal{H}}$ . Under Assumptions 1 and 2, there exist constants  $C_1, C_2 > 0$  such that for all  $\varepsilon > 0$ ,*

$$\mathbb{P}\left(\left|\widetilde{R}_{\text{emp}}(\widehat{f}, \widehat{\beta}) - \widetilde{R}_{\text{emp}}(\widetilde{f}, \widetilde{\beta})\right| > \varepsilon\right) \leq C_1 \exp\left(-\frac{C_2 n\varepsilon^2}{1 + (\kappa\tau)^2}\right).$$

**Theorem S.3.** *Under Assumptions 1 and 2, for all  $\varepsilon > 0$*

$$\mathbb{P}\left(\widetilde{R}_{\text{emp}}(\widetilde{f}, \widetilde{\beta}) - R(f^*, \beta^*) > \varepsilon\right) \leq 2 \exp\left(-\frac{n\varepsilon^2}{16(\|\theta^*\|_\infty + \kappa\tau)^4}\right).$$

**Theorem S.4.** *Let Assumptions 1 and 2 be true, and let  $\beta(f) := n^{-1} \sum_{i=1}^n y_i^\top \theta^* - \langle \overline{\Phi}, f \rangle_{\mathcal{H}} = \overline{Y\theta^*} - \langle \overline{\Phi}, f \rangle_{\mathcal{H}}$  be the minimizing  $\beta \in I_\tau$  for fixed  $f \in \mathcal{H}_\tau$  in the modified empirical risk. There exist constants  $C_1, C_2 > 0$  such that for all  $\varepsilon > 0$*

$$\mathbb{P}\left(\sup_{f \in \mathcal{H}_\tau} |R_{\text{emp}}(f) - \widetilde{R}_{\text{emp}}(f, \beta(f))| > \varepsilon\right) \leq C_1 \exp\left(-\frac{C_2 n\varepsilon^2}{1 + (\kappa\tau)^2}\right).$$

**Definition 1.** *The empirical measure  $T_x$  with respect to  $\{x_i\}_{i=1}^n$  is defined as  $T_x := n^{-1} \sum_{i=1}^n \delta(x_i)$ , where  $\delta(x_i)$  is the point mass at  $x_i$ . The space  $L^2(T_x)$  is the set  $\mathcal{H}_\tau$  equipped with the semi-norm*

$$\|f\|_{L^2(T_x)} := \sqrt{\frac{1}{n} \sum_{i=1}^n |f(x_i)|^2} = \sqrt{\frac{1}{n} \sum_{i=1}^n |\langle \Phi(x_i), f \rangle_{\mathcal{H}}|^2}.$$

**Definition 2.** *Let  $(X, d)$  be a pseudometric space. An  $\varepsilon$ -net is any subset  $\widetilde{X} \subset X$  such that for any  $x \in X$ , there exists a  $\widetilde{x} \in \widetilde{X}$  satisfying  $d(x, \widetilde{x}) < \varepsilon$ . The  $\varepsilon$ -covering number of  $(X, d)$  is the minimum size of an  $\varepsilon$ -net for  $X$ .*

**Remark 1.** *Distances in  $\mathcal{H}_\tau$  are given by the semi-norm generated by  $L^2(T_x)$ . Distances in  $I_\tau$  are given by the Euclidean distance  $d(\beta_1, \beta_2) = |\beta_1 - \beta_2|$ .*

### S.2.3 Proofs of Supplementary Theorems

*Proof of Theorem S.1.* Let  $\{(x_j, y_j)\}_{j=n+1}^{2n}$  be independent from  $\{(x_i, y_i)\}_{i=1}^n$  and identically distributed set of  $n$  pairs, and let  $T_x$  be the empirical measure on  $\{(x_i, y_i)\}_{i=1}^{2n}$ . Let  $\tilde{R}_{\text{emp}}(f, \beta)$  be the modified empirical risk on  $\{(x_i, y_i)\}_{i=1}^n$ , and  $\tilde{R}'_{\text{emp}}(f, \beta)$  on  $\{(x_j, y_j)\}_{j=n+1}^{2n}$ . By symmetrization lemma (see, for example, Lemma 2 in [1]), for  $n\varepsilon^2 \geq 2$

$$\mathbb{P}\left(\sup_{f \in \mathcal{H}_\tau, \beta \in I_\tau} \{R(f, \beta) - \tilde{R}_{\text{emp}}(f, \beta)\} > \varepsilon\right) \leq 2\mathbb{P}\left(\sup_{f \in \mathcal{H}_\tau, \beta \in I_\tau} \{\tilde{R}'_{\text{emp}}(f, \beta) - \tilde{R}_{\text{emp}}(f, \beta)\} > \frac{\varepsilon}{2}\right).$$

Let  $c = 64(\|\theta^*\|_\infty + \kappa\tau)$ , and let  $\{f_1, \dots, f_M\}$  be the smallest  $L^2(T_x)$   $\varepsilon/\sqrt{2}c$ -net of  $\mathcal{H}_\tau$  and  $\{\beta_1, \dots, \beta_K\}$  an  $\varepsilon/c$ -net of  $I_\tau$ . Applying Lemma 4 to the above display

$$\mathbb{P}\left(\sup_{f \in \mathcal{H}_\tau, \beta \in I_\tau} \{R(f, \beta) - \tilde{R}_{\text{emp}}(f, \beta)\} > \varepsilon\right) \leq 2\mathbb{P}\left(\max_{\substack{f \in \{f_1, \dots, f_M\} \\ \beta \in \{\beta_1, \dots, \beta_K\}}} \{\tilde{R}'_{\text{emp}}(f, \beta) - \tilde{R}_{\text{emp}}(f, \beta)\} > \frac{\varepsilon}{4}\right).$$

Applying Lemma 5 to the right-hand expression gives the final inequality

$$\mathbb{P}\left(\sup_{f \in \mathcal{H}_\tau, \beta \in I_\tau} \{R(f, \beta) - \tilde{R}_{\text{emp}}(f, \beta)\} > \varepsilon\right) \leq 2\{1 + 2(\|\theta^*\|_\infty + \kappa\tau)/\varepsilon\} \exp\left(\frac{C_1\tau^2}{\varepsilon^2}\right) \exp\left(-\frac{n\varepsilon^2}{128(\|\theta^*\|_\infty + \kappa\tau)^4}\right).$$

This completes the proof of Theorem S.1.  $\square$

*Proof of Theorem S.2.* Let  $\beta(f) = \overline{Y\theta^*} - \langle \overline{\Phi}, f \rangle_{\mathcal{H}}$ . By definition of  $\tilde{f}, \tilde{\beta} = \beta(\tilde{f}), \tilde{R}_{\text{emp}}(\tilde{f}, \tilde{\beta}) \geq \tilde{R}_{\text{emp}}(\tilde{f}, \tilde{\beta})$ . On the other hand, since  $R_{\text{emp}}(\hat{f}) \leq R_{\text{emp}}(\tilde{f})$ ,

$$\begin{aligned} \tilde{R}_{\text{emp}}(\hat{f}, \hat{\beta}) - \tilde{R}_{\text{emp}}(\tilde{f}, \tilde{\beta}) &= \tilde{R}_{\text{emp}}(\hat{f}, \hat{\beta}) - R_{\text{emp}}(\hat{f}) + R_{\text{emp}}(\hat{f}) - R_{\text{emp}}(\tilde{f}) + R_{\text{emp}}(\tilde{f}) - \tilde{R}_{\text{emp}}(\tilde{f}, \tilde{\beta}) \\ &\leq \tilde{R}_{\text{emp}}(\hat{f}, \hat{\beta}) - R_{\text{emp}}(\hat{f}) + R_{\text{emp}}(\tilde{f}) - \tilde{R}_{\text{emp}}(\tilde{f}, \tilde{\beta}) \\ &\leq \tilde{R}_{\text{emp}}(\hat{f}, \hat{\beta}) - \tilde{R}_{\text{emp}}(\hat{f}, \beta(\hat{f})) + \tilde{R}_{\text{emp}}(\hat{f}, \beta(\hat{f})) - R_{\text{emp}}(\hat{f}) + R_{\text{emp}}(\tilde{f}) - \tilde{R}_{\text{emp}}(\tilde{f}, \tilde{\beta}) \\ &\leq \underbrace{\left| \tilde{R}_{\text{emp}}(\hat{f}, \hat{\beta}) - \tilde{R}_{\text{emp}}(\hat{f}, \beta(\hat{f})) \right|}_{I_1} + 2 \underbrace{\sup_{f \in \mathcal{H}_\tau} \left| R_{\text{emp}}(f) - \tilde{R}_{\text{emp}}(f, \beta(f)) \right|}_{I_2}. \end{aligned}$$

The union bound and de Morgan's law proves

$$\mathbb{P}\left(\tilde{R}_{\text{emp}}(\hat{f}, \hat{\beta}) - \tilde{R}_{\text{emp}}(\tilde{f}, \tilde{\beta}) > \varepsilon\right) \leq \mathbb{P}\left(I_1 > \frac{\varepsilon}{2}\right) + \mathbb{P}\left(I_2 > \frac{\varepsilon}{2}\right).$$

Consider  $I_1$

$$\begin{aligned} &\left| \tilde{R}_{\text{emp}}(\hat{f}, \hat{\beta}) - \tilde{R}_{\text{emp}}(\hat{f}, \beta(\hat{f})) \right| \\ &= \left| \frac{1}{n} \sum_{i=1}^n \left( y_i^\top \theta^* - \langle \Phi(x_i) - \overline{\Phi}, \hat{f} \rangle_{\mathcal{H}} \right)^2 - \frac{1}{n} \sum_{i=1}^n \left( y_i^\top \theta^* - \overline{Y\theta^*} - \langle \Phi(x_i) - \overline{\Phi}, \hat{f} \rangle_{\mathcal{H}} \right)^2 \right| \\ &= \left| 2 \frac{1}{n} \sum_{i=1}^n \overline{Y\theta^*} \left( y_i^\top \theta^* - \langle \Phi(x_i) - \overline{\Phi}, \hat{f} \rangle_{\mathcal{H}} \right) - \frac{1}{n} \sum_{i=1}^n (\overline{Y\theta^*})^2 \right| \\ &= \left| (\overline{Y\theta^*})^2 - 2(\overline{Y\theta^*}) \frac{1}{n} \sum_{i=1}^n \langle \Phi(x_i) - \overline{\Phi}, \hat{f} \rangle_{\mathcal{H}} \right| \\ &= |\overline{Y\theta^*}|^2. \end{aligned}$$

By Lemma 7, there exists  $C_1 > 0$  such that  $\mathbb{P}(I_1 > \varepsilon/2) \leq 2 \exp(-C_1 n \varepsilon)$  for all  $\varepsilon > 0$ . By Theorem S.4, there exists constants  $C_2, C_3 > 0$  such that  $\mathbb{P}(I_2 > \varepsilon/2) \leq C_2 \exp[-C_3(n\varepsilon^2)/\{1 + (\kappa\tau)^2\}]$ . Combining the bounds for

$I_1$  and  $I_2$  gives

$$\begin{aligned} \mathbb{P}\left(\tilde{R}_{\text{emp}}(\hat{f}, \hat{\beta}) - \tilde{R}_{\text{emp}}(\tilde{f}, \tilde{\beta}) > \varepsilon\right) &\leq 2 \exp(-C_1 n \varepsilon) + C_2 \exp\left(-\frac{C_3 n \varepsilon^2}{1 + (\kappa \tau)^2}\right) \\ &\leq C_4 \exp\left(-\frac{C_5 n \varepsilon^2}{1 + (\kappa \tau)^2}\right) \end{aligned}$$

for some constants  $C_i > 0$ . This completes the proof of Theorem S.2.  $\square$

*Proof of Theorem S.3.* Consider

$$\begin{aligned} \tilde{R}_{\text{emp}}(\tilde{f}, \tilde{\beta}) - R(f^*, \beta^*) &= \tilde{R}_{\text{emp}}(\tilde{f}, \tilde{\beta}) - \tilde{R}_{\text{emp}}(f^*, \beta^*) + \tilde{R}_{\text{emp}}(f^*, \beta^*) - R(f^*, \beta^*) \\ &\leq \tilde{R}_{\text{emp}}(f^*, \beta^*) - R(f^*, \beta^*), \end{aligned}$$

where the last inequality follows since  $\tilde{R}_{\text{emp}}(\tilde{f}, \tilde{\beta}) \leq \tilde{R}_{\text{emp}}(f^*, \beta^*)$  by the definition of  $\tilde{f}, \tilde{\beta}$ .

Let  $z_i := |y_i^\top \theta^* - \beta^* - \langle \Phi(x_i), f^* \rangle_{\mathcal{H}}|^2$ , then  $\tilde{R}_{\text{emp}}(f^*, \beta^*) = n^{-1} \sum_{i=1}^n z_i$  is the average of i.i.d. random variables with  $\mathbb{E}z_i = R(f^*, \beta^*)$  by definition of expected risk. Since  $|z_i| \leq 4(\|\theta^*\|_\infty + \kappa \tau)^2$ , by Hoeffding's inequality

$$\mathbb{P}(|\tilde{R}_{\text{emp}}(f^*, \beta^*) - R(f^*, \beta^*)| > \varepsilon) = \mathbb{P}\left(\left|n^{-1} \sum_{i=1}^n (z_i - \mathbb{E}z_i)\right| > \varepsilon\right) \leq 2 \exp\left(-\frac{n \varepsilon^2}{16(\|\theta^*\|_\infty + \kappa \tau)^4}\right).$$

$\square$

*Proof of Theorem S.4.* By definition of  $R_{\text{emp}}(f)$  and  $\tilde{R}_{\text{emp}}(f, \beta(f))$ ,

$$\begin{aligned} R_{\text{emp}}(f) - \tilde{R}_{\text{emp}}(f, \beta(f)) &= \frac{1}{n} \sum_{i=1}^n |y_i^\top \hat{\theta} - \langle \Phi(x_i), f \rangle_{\mathcal{H}}|^2 - \frac{1}{n} \sum_{i=1}^n |y_i^\top \theta^* - \beta(f) - \langle \Phi(x_i), f \rangle_{\mathcal{H}}|^2 \\ &= \frac{1}{n} \sum_{i=1}^n |y_i^\top \hat{\theta} - \langle \Phi(x_i), f \rangle_{\mathcal{H}}|^2 - \frac{1}{n} \sum_{i=1}^n |y_i^\top \theta^* - \bar{Y} \theta^* - \langle \Phi(x_i), f \rangle_{\mathcal{H}}|^2. \end{aligned}$$

Expanding the squares and cancelling equal terms yields

$$\begin{aligned} R_{\text{emp}}(f) - \tilde{R}_{\text{emp}}(f, \beta(f)) &= \frac{1}{n} \sum_{i=1}^n \left\{ (y_i^\top \hat{\theta})^2 - (y_i^\top \theta^*)^2 - 2y_i^\top (\hat{\theta} - \theta^*) \langle \Phi(x_i), f \rangle_{\mathcal{H}} - 2\bar{Y} \theta^* \langle \Phi(x_i), f \rangle_{\mathcal{H}} + 2y_i^\top \theta^* \bar{Y} \theta^* - (\bar{Y} \theta^*)^2 \right\} \\ &= \frac{1}{n} \sum_{i=1}^n \left\{ (y_i^\top \hat{\theta})^2 - (y_i^\top \theta^*)^2 \right\} - \frac{1}{n} \sum_{i=1}^n \left\{ 2y_i^\top (\hat{\theta} - \theta^*) \langle \Phi(x_i), f \rangle_{\mathcal{H}} \right\} + (\bar{Y} \theta^*)^2 \\ &= I_1 + I_2(f) + I_3, \end{aligned}$$

where  $I_1$  and  $I_3$  are independent of  $f$ . By the union bound and de Morgan's law,

$$\mathbb{P}\left(\sup_{f \in \mathcal{H}_\tau} |R_{\text{emp}}(f) - \tilde{R}_{\text{emp}}(f, \beta(f))| > \varepsilon\right) \leq \mathbb{P}\left(|I_1| > \frac{\varepsilon}{3}\right) + \mathbb{P}\left(\sup_{f \in \mathcal{H}_\tau} |I_2(f)| > \frac{\varepsilon}{3}\right) + \mathbb{P}\left(|I_3| > \frac{\varepsilon}{3}\right).$$

We bound each probability separately. Since  $y_i \in \mathbb{R}^2$  is an indicator vector of class membership for sample  $i$ , using the definition of  $\hat{\theta}$  and  $\theta^*$

$$|I_1| = \left| \frac{1}{n} \sum_{i=1}^n \left\{ (y_i^\top \hat{\theta})^2 - (y_i^\top \theta^*)^2 \right\} \right| \leq \max_i |(y_i^\top \hat{\theta})^2 - (y_i^\top \theta^*)^2| = \max\left(|n_1/n_2 - \pi_1/\pi_2|, |n_2/n_1 - \pi_2/\pi_1|\right).$$

By Lemma 6, there exist  $C_1, C_2 > 0$  such that  $\mathbb{P}(|I_1| > \varepsilon/3) \leq C_1 \exp(-C_2 n \varepsilon^2)$ .

By Hölder’s and Cauchy-Schwarz inequalities

$$\begin{aligned}
 |I_2(f)| &= \left| \frac{1}{n} \sum_{i=1}^n 2y_i^\top (\hat{\theta} - \theta^*) \langle \Phi(x_i) - \bar{\Phi}, f \rangle_{\mathcal{H}} \right| \\
 &\leq \frac{1}{n} \sum_{i=1}^n 2|y_i^\top (\hat{\theta} - \theta^*)| \cdot |\langle \Phi(x_i) - \bar{\Phi}, f \rangle_{\mathcal{H}}| \\
 &\leq 2\|\hat{\theta} - \theta^*\|_\infty \max_i |\langle \Phi(x_i) - \bar{\Phi}, f \rangle_{\mathcal{H}}| \\
 &\leq 2 \max \left( |\sqrt{n_1/n_2} - \sqrt{\pi_1/\pi_2}|, |\sqrt{n_2/n_1} - \sqrt{\pi_2/\pi_1}| \right) \max_i \|\Phi(x_i) - \bar{\Phi}\|_{\mathcal{H}} \|f\|_{\mathcal{H}} \\
 &\leq 4 \max \left( |\sqrt{n_1/n_2} - \sqrt{\pi_1/\pi_2}|, |\sqrt{n_2/n_1} - \sqrt{\pi_2/\pi_1}| \right) \kappa\tau,
 \end{aligned}$$

where we used Assumption 2 in the last inequality. Since the upper bound does not depend on  $f$ , the same bound holds for  $\sup_{f \in \mathcal{H}_\tau} |I_2(f)|$ . Combining the bound with Lemma 6 gives for some  $C_3, C_4 > 0$

$$\mathbb{P} \left( \sup_{f \in \mathcal{H}_\tau} |I_2(f)| > \varepsilon \right) \leq \mathbb{P} \left( \max \left( |\sqrt{n_1/n_2} - \sqrt{\pi_1/\pi_2}|, |\sqrt{n_2/n_1} - \sqrt{\pi_2/\pi_1}| \right) > \frac{\varepsilon}{4\kappa\tau} \right) \leq C_3 \exp(-C_4 \frac{n\varepsilon^2}{(\kappa\tau)^2}).$$

By Lemma 7, there exists  $C_5 > 0$  such that  $\mathbb{P}(|I_3| > \varepsilon/3) \leq 2 \exp(-C_5 n \varepsilon)$ .

Combining the bounds for  $I_1, I_2$  and  $I_3$  gives

$$\begin{aligned}
 \mathbb{P} \left( \sup_{f \in \mathcal{H}_\tau} |R_{\text{emp}}(f) - \tilde{R}_{\text{emp}}(f, \beta(f))| > \varepsilon \right) &\leq C_1 \exp(-C_2 n \varepsilon^2) + C_3 \exp(-C_4 \frac{n\varepsilon^2}{(\kappa\tau)^2}) + 2 \exp(-C_5 n \varepsilon) \\
 &\leq C_6 \exp \left( -C_7 \frac{n\varepsilon^2}{1 + (\kappa\tau)^2} \right)
 \end{aligned}$$

for some  $C_6, C_7 > 0$ . This completes the proof of Theorem S.4.  $\square$

### S3 Supplementary Lemmas

**Lemma 1.** Consider minimizing  $f(w) = 2^{-1}w^\top Qw - \beta^\top w + 2^{-1}\lambda\|w\|_1$  with respect to  $w \in \mathbb{R}^p$  with  $w_i \in [-1, 1]$ , where  $Q$  is positive semi-definite and  $\lambda \geq 0$ . If  $\lambda \geq 2\|\beta\|_\infty$ , then the minimizing  $w$  is the zero vector.

*Proof.* Consider  $2^{-1}\lambda\|w\|_1 - \beta^\top w = \sum_{i=1}^p (\lambda/2|w_i| - \beta_i w_i)$ . If  $\lambda \geq 2\|\beta\|_\infty$ , this expression is non-negative for all  $w \in \mathbb{R}^p$  and a minimum occurs at  $w = 0$ . Since  $Q$  is positive semi-definite,  $w^\top \frac{1}{2}Qw$  is always non-negative with a minimum at  $w = 0$ . It follows that for  $\lambda \geq 2\|\beta\|_\infty$  the sum of these terms attains minimum at  $w = 0$ .  $\square$

**Lemma 2.** Let  $M = [(CKC)^2 + n\gamma(CKC)]^{-1}CKC$ , then  $\|M\|_{op} \leq (n\gamma)^{-1}$ .

*Proof of Lemma 2.* The kernel matrix  $K$  is positive semi-definite since by the reproducing property for any  $\alpha \in \mathbb{R}^n$

$$\alpha^\top \mathbf{K} \alpha = \left\langle \sum_{i=1}^n \alpha_i \Phi(x_i), \sum_{i=1}^n \alpha_i \Phi(x_i) \right\rangle_{\mathcal{H}} = \left\| \sum_{i=1}^n \alpha_i \Phi(x_i) \right\|_{\mathcal{H}}^2 \geq 0.$$

It follows that  $CKC$  is also positive semi-definite. Let  $\{\lambda_i\}_{i=1}^k$  be the set of non-zero eigenvalues of  $CKC$ , then  $\{\lambda_i/(\lambda_i^2 + n\gamma\lambda_i)\}_{i=1}^k$  are the non-zero eigenvalues of  $M = [(CKC)^2 + n\gamma(CKC)]^{-1}CKC$ . The function  $t \mapsto t/(t^2 + n\gamma t)$  is bounded above by  $(n\gamma)^{-1}$  for  $t > 0$ , hence  $\|M\|_{op} \leq (n\gamma)^{-1}$ .  $\square$

**Lemma 3.** Let  $\gamma > 0$ . The minimizer  $\hat{f}$  in (4) satisfies  $\|\hat{f}\|_{\mathcal{H}} \leq 1/\sqrt{\gamma}$ . Additionally, if Assumption 2 holds for  $\kappa > 0$ , then  $\|\hat{f}\|_{\mathcal{H}} \leq 2\kappa/\gamma$ .

*Proof of Lemma 3.* Comparing the value of objective function in (4) at  $f = \hat{f}$  with the value at  $f = 0$  gives

$$\gamma \|\hat{f}\|_{\mathcal{H}}^2 \leq \frac{1}{n} \sum_{i=1}^n \left| y_i^\top \hat{\theta} - \langle \Phi(x_i) - \bar{\Phi}, \hat{f} \rangle_{\mathcal{H}} \right|^2 + \gamma \|\hat{f}\|_{\mathcal{H}}^2 \leq \frac{1}{n} \sum_{i=1}^n |y_i^\top \hat{\theta}|^2 = 1.,$$

where the last equality follows since  $n^{-1} \hat{\theta}^\top Y^\top Y \hat{\theta} = 1$ . It follows that  $\|\hat{f}\|_{\mathcal{H}} \leq 1/\sqrt{\gamma}$ .

On the other hand, since  $\hat{f} = \sum_{i=1}^n \alpha_i (\Phi(x_i) - \bar{\Phi})$ , by the triangle inequality and Assumption 2

$$\|\hat{f}\|_{\mathcal{H}} = \left\| \sum_{i=1}^n \alpha_i (\Phi(x_i) - \bar{\Phi}) \right\|_{\mathcal{H}} \leq \sum_{i=1}^n |\alpha_i| \|\Phi(x_i) - \bar{\Phi}\|_{\mathcal{H}} \leq \max_i \|\Phi(x_i) - \bar{\Phi}\|_{\mathcal{H}} \|\alpha\|_1 \leq 2\kappa \|\alpha\|_1 \leq 2\kappa \sqrt{n} \|\alpha\|_2.$$

Since  $\alpha = \{(C\mathbf{K}C)^2 + \gamma n C\mathbf{K}C\}^{-1} C\mathbf{K}C Y \hat{\theta}$ , applying Lemma 2 and using  $\|Y \hat{\theta}\|_2 = \sqrt{\hat{\theta}^\top Y^\top Y \hat{\theta}} = \sqrt{n}$  gives

$$\|\alpha\|_2 \leq \|\{(C\mathbf{K}C)^2 + \gamma n C\mathbf{K}C\}^{-1} C\mathbf{K}C\|_{\text{op}} \|Y \hat{\theta}\|_2 \leq \frac{\|Y \hat{\theta}\|_2}{n\gamma} \leq \frac{1}{\sqrt{n\gamma}}.$$

Combining the above two displays gives  $\|\hat{f}\|_{\mathcal{H}} \leq 2\kappa/\gamma$ .  $\square$

**Lemma 4.** *Under Assumptions 1 and 2, let  $\{(x_i, y_i)\}_{i=1}^n$  and  $\{(x_j, y_j)\}_{j=n+1}^{2n}$  be two independent copies of i.i.d. data, and let  $T_x$  be the empirical measure on their union. Let  $\tilde{R}_{\text{emp}}(f, \beta)$  be the modified empirical risk on  $\{(x_i, y_i)\}_{i=1}^n$ , and  $\tilde{R}'_{\text{emp}}(f, \beta)$  on  $\{(x_j, y_j)\}_{j=n+1}^{2n}$ . Let  $c = 64(\|\theta^*\|_\infty + \kappa\tau)$ , and let  $\{f_1, \dots, f_M\}$  be the smallest  $L^2(T_x)$   $\varepsilon/\sqrt{2}c$ -net of  $\mathcal{H}_\tau$ , and let  $\{\beta_1, \dots, \beta_K\}$  be an  $\varepsilon/c$ -net of  $I_\tau$ . Then*

$$\mathbb{P} \left( \sup_{\substack{f \in \mathcal{H}_\tau \\ \beta \in I_\tau}} \{\tilde{R}_{\text{emp}}(f, \beta) - \tilde{R}'_{\text{emp}}(f, \beta)\} > \frac{\varepsilon}{2} \right) \leq \mathbb{P} \left( \max_{\substack{f \in \{f_1, \dots, f_M\} \\ \beta \in \{\beta_1, \dots, \beta_K\}}} \{\tilde{R}_{\text{emp}}(f, \beta) - \tilde{R}'_{\text{emp}}(f, \beta)\} > \frac{\varepsilon}{4} \right).$$

*Proof of Lemma 4.* Let  $f \in \mathcal{H}_\tau$ ,  $\beta \in I_\tau$  be such that  $\tilde{R}_{\text{emp}}(f, \beta) - \tilde{R}'_{\text{emp}}(f, \beta) > \varepsilon/2$ . There exists  $f_j \in \{f_1, \dots, f_M\}$  and  $\beta_\ell \in \{\beta_1, \dots, \beta_K\}$  such that  $\|f_j - f\|_{L^2(T_x)} < \varepsilon/\sqrt{2}c$  and  $|\beta - \beta_\ell| < \varepsilon/c$ . Applying Lemma 9 gives

$$\sqrt{\frac{1}{n} \sum_{i=1}^n |f(x_i) - f_j(x_i)|^2} < \frac{\varepsilon}{c} \quad \text{and} \quad \sqrt{\frac{1}{n} \sum_{i=n+1}^{2n} |f(x_i) - f_j(x_i)|^2} < \frac{\varepsilon}{c}.$$

Applying Lemma 8 yields

$$|\tilde{R}_{\text{emp}}(f, \beta) - \tilde{R}_{\text{emp}}(f_j, \beta_\ell)| < 8 \frac{\varepsilon}{c} (\|\theta^*\|_\infty + \kappa\tau) = \frac{\varepsilon}{8},$$

and similarly  $|\tilde{R}'_{\text{emp}}(f, \beta) - \tilde{R}'_{\text{emp}}(f_j, \beta_\ell)| < \varepsilon/8$ . Therefore,  $\tilde{R}'_{\text{emp}}(f, \beta) - \tilde{R}_{\text{emp}}(f, \beta) > \varepsilon/2$  for some  $f \in \mathcal{H}_\tau$ ,  $\beta \in I_\tau$  implies  $\tilde{R}'_{\text{emp}}(f_j, \beta_\ell) - \tilde{R}_{\text{emp}}(f_j, \beta_\ell) > \varepsilon/4$  for some  $f_j$  and  $\beta_\ell$ . Therefore,

$$\mathbb{P} \left( \sup_{f \in \mathcal{H}_\tau, \beta \in I_\tau} \{\tilde{R}'_{\text{emp}}(f, \beta) - \tilde{R}_{\text{emp}}(f, \beta)\} > \frac{\varepsilon}{2} \right) \leq \mathbb{P} \left( \max_{\substack{f \in \{f_1, \dots, f_M\} \\ \beta \in \{\beta_1, \dots, \beta_K\}}} \{\tilde{R}'_{\text{emp}}(f, \beta) - \tilde{R}_{\text{emp}}(f, \beta)\} > \frac{\varepsilon}{4} \right).$$

$\square$

**Lemma 5.** *Under Assumptions 1-3, let  $\{f_1, \dots, f_M\}$  and  $\{\beta_1, \dots, \beta_K\}$  be as in Lemma 4. There exist a constant  $C_1 > 0$  such that for all  $\varepsilon > 0$ ,*

$$\mathbb{P} \left( \max_{\substack{f \in \{f_1, \dots, f_M\} \\ \beta \in \{\beta_1, \dots, \beta_K\}}} \{\tilde{R}_{\text{emp}}(f, \beta) - \tilde{R}'_{\text{emp}}(f, \beta)\} > \frac{\varepsilon}{4} \right) \leq \mathcal{N}_\varepsilon \exp \left( - \frac{n\varepsilon^2}{128(\|\theta^*\|_\infty + \kappa\tau)^4} \right),$$

where  $\mathcal{N}_\varepsilon = \{1 + 2(\|\theta^*\|_\infty + \kappa\tau)/\varepsilon\} \exp(C_1 \tau^2 \varepsilon^{-2})$ .

*Proof of Lemma 5.* Let  $\sigma = \{\sigma_i\}_{i=1}^n$  be *i.i.d.* Radamacher random variables,  $\mathbb{P}(\sigma_i = 1) = \mathbb{P}(\sigma_i = -1) = 1/2$ . Let

$$\tilde{R}_{\text{emp}}^\sigma = \frac{1}{n} \sum_{i=1}^n \sigma_i |y_i^\top \theta^* - \beta - \langle \Phi(x_i), f \rangle_{\mathcal{H}}|^2, \quad \tilde{R}'_{\text{emp}}{}^\sigma = \frac{1}{n} \sum_{i=n+1}^{2n} \sigma_i |y_i^\top \theta^* - \beta - \langle \Phi(x_i), f \rangle_{\mathcal{H}}|^2.$$

Since  $(y_i, x_i)$  and  $(y_{n+i}, x_{n+i})$  are independent, and have the same distribution, the distribution of  $\xi_i := (|y_i^\top \theta^* - \beta - \langle \Phi(x_i), f \rangle_{\mathcal{H}}|^2 - |y_{n+i}^\top \theta^* - \beta - \langle \Phi(x_{n+i}), f \rangle_{\mathcal{H}}|^2)$  is the same as distribution of  $\sigma_i \xi_i$ . Let  $Z = \{(x_i, y_i)\}_{i=1}^{2n}$ , then

$$\mathbb{P}_Z \left( \max_{\substack{f \in \{f_1, \dots, f_M\} \\ \beta \in \{\beta_1, \dots, \beta_K\}}} \{\tilde{R}_{\text{emp}}(f, \beta) - \tilde{R}'_{\text{emp}}(f, \beta)\} > \frac{\varepsilon}{4} \right) = \mathbb{P}_{Z, \sigma} \left( \max_{\substack{f \in \{f_1, \dots, f_M\} \\ \beta \in \{\beta_1, \dots, \beta_K\}}} \{\tilde{R}_{\text{emp}}^\sigma(f, \beta) - \tilde{R}'_{\text{emp}}{}^\sigma(f, \beta)\} > \frac{\varepsilon}{4} \right).$$

Let  $\mathcal{A}_{m,k}$  be the event  $\mathcal{A}_{m,k} = \{\tilde{R}_{\text{emp}}^\sigma(f_m, \beta_k) - \tilde{R}'_{\text{emp}}{}^\sigma(f_m, \beta_k) > \varepsilon/4\}$  for  $m = 1, \dots, M(Z)$ ;  $k = 1, \dots, K$ ; where  $M(Z)$  emphasizes the dependence of  $M$  on  $Z$ . Using properties of conditional expectation and union bound

$$\begin{aligned} \mathbb{P}_{Z, \sigma} \left( \max_{\substack{f \in \{f_1, \dots, f_M\} \\ \beta \in \{\beta_1, \dots, \beta_K\}}} \{\tilde{R}_{\text{emp}}^\sigma(f, \beta) - \tilde{R}'_{\text{emp}}{}^\sigma(f, \beta)\} > \frac{\varepsilon}{4} \right) &= \mathbb{P}_{Z, \sigma} (\cup_{m=1}^{M(Z)} \cup_{k=1}^K \mathcal{A}_{m,k}) \\ &= \mathbb{E}_Z \left\{ \mathbb{P}_\sigma (\cup_{m=1}^{M(Z)} \cup_{k=1}^K \mathcal{A}_{m,k} | Z) \right\} \\ &\leq \mathbb{E}_Z \{M(Z) K \mathbb{P}_\sigma(\mathcal{A}_{m,k} | Z)\}. \end{aligned}$$

For fixed  $f_m, \beta_k$  and conditionally on  $Z$ , the terms  $\psi_i := \sigma_i (|y_i^\top \theta^* - \beta_k - \langle \Phi(x_i), f_m \rangle_{\mathcal{H}}|^2 - |y_{n+i}^\top \theta^* - \beta_k - \langle \Phi(x_{n+i}), f_m \rangle_{\mathcal{H}}|^2)$ ,  $i = 1, \dots, n$ , are independent, mean-zero random variables with  $|\psi_i| \leq 4(\|\theta^*\|_\infty + \kappa\tau)^2$ . Applying Hoeffding's inequality gives

$$\mathbb{P}_\sigma(\mathcal{A}_{m,k} | Z) = \mathbb{P}_\sigma \left( \frac{1}{n} \sum_{i=1}^n \psi_i > \varepsilon/4 \mid Z \right) \leq \exp \left( - \frac{n\varepsilon^2}{128(\|\theta^*\|_\infty + \kappa\tau)^4} \right).$$

On the other hand, since  $I_\tau$  is a one-dimensional sphere of radius  $\|\theta^*\| + \kappa\tau$ ,  $K$  is independent of the data and  $K \leq 1 + 2(\|\theta^*\|_\infty + \kappa\tau)/\varepsilon$ . Combining this with the above two displays gives

$$\begin{aligned} \mathbb{P}_{Z, \sigma} \left( \max_{\substack{f \in \{f_1, \dots, f_M\} \\ \beta \in \{\beta_1, \dots, \beta_K\}}} \{\tilde{R}_{\text{emp}}^\sigma(f, \beta) - \tilde{R}'_{\text{emp}}{}^\sigma(f, \beta)\} > \frac{\varepsilon}{4} \right) \\ \leq \{1 + 2(\|\theta^*\|_\infty + \kappa\tau)/\varepsilon\} \mathbb{E}_Z \{M(Z)\} \exp \left( - \frac{n\varepsilon^2}{128(\|\theta^*\|_\infty + \kappa\tau)^4} \right). \end{aligned}$$

Recall that  $\{f_1, \dots, f_M\}$  is the smallest  $L^2(T_x)$   $\varepsilon/\sqrt{2}c$ -net of  $\mathcal{H}_\tau$ , with  $c = 64(\|\theta^*\|_\infty + \tau\kappa)$ . By Lemma 10

$$\mathbb{E}_Z \{M(Z)\} \leq \sup_{Z=\{(x_i, y_i)\}_{i=1}^{2n}} M(Z) \leq \exp \left( \frac{C_1 \tau^2}{\varepsilon^2} \right) \quad (\text{S3.1})$$

for some constant  $C_1 > 0$ . Setting  $\mathcal{N}_\varepsilon = \{1 + 2(\|\theta^*\|_\infty + \kappa\tau)/\varepsilon\} \exp(C_1 \tau^2 \varepsilon^{-2})$  completes the proof of Lemma 5.  $\square$

**Lemma 6.** *Under Assumption 1 there exist constants  $C_1, C_2 > 0$  such that for all  $\varepsilon > 0$ ,*

$$\begin{aligned} \mathbb{P} \left( \max \left( |n_1/n_2 - \pi_1/\pi_2|, |n_2/n_1 - \pi_2/\pi_1| \right) > \varepsilon \right) &\leq C_1 \exp \left( -C_2 n \varepsilon^2 \right), \\ \mathbb{P} \left( \max \left( |\sqrt{n_1/n_2} - \sqrt{\pi_1/\pi_2}|, |\sqrt{n_2/n_1} - \sqrt{\pi_2/\pi_1}| \right) > \varepsilon \right) &\leq C_1 \exp \left( -C_2 n \varepsilon^2 \right). \end{aligned}$$



*Proof of Lemma 6.* We provide the proof for  $n_1/n_2$ , the proof for  $n_2/n_1$  is analogous. The first inequality is equivalent to Lemma 1 in [2]. For the second inequality, by Taylor expansion of the square root function centered at  $\pi_1/\pi_2$

$$\sqrt{n_1/n_2} - \sqrt{\pi_1/\pi_2} = 2^{-1}\sqrt{\pi_2/\pi_1}(n_1/n_2 - \pi_1/\pi_2) + o(n_1/n_2 - \pi_1/\pi_2).$$

Since  $|n_1/n_2 - \pi_1/\pi_2| = O_p(n^{-1/2})$  by the first inequality, it follows that there exist a constant  $C_3 > 0$  such that  $|\sqrt{n_1/n_2} - \sqrt{\pi_1/\pi_2}| \leq C_2\{\log(\eta^{-1})/n\}^{1/2}$  with probability at least  $1 - \eta$ . Setting  $\varepsilon = C_3\{\log(\eta^{-1})/n\}^{1/2}$  and solving for  $\eta$  completes the proof.  $\square$

**Lemma 7.** *Let Assumption 1 be true. For all  $\varepsilon > 0$ , we have  $\mathbb{P}((\overline{Y\theta^*})^2 > \varepsilon) \leq 2\exp(-n\varepsilon/\|\theta^*\|_\infty)$ .*

*Proof of Lemma 7.* Let  $z_i = y_i^\top \theta^*$ , then  $z_i$  are independent,

$$\mathbb{E}(z_i) = \mathbb{E}(y_i)^\top \theta^* = \pi_1 \sqrt{\frac{\pi_2}{\pi_1}} - \pi_2 \sqrt{\frac{\pi_1}{\pi_2}} = \sqrt{\pi_1 \pi_2} - \sqrt{\pi_1 \pi_2} = 0$$

and

$$(\overline{Y\theta^*})^2 = (n^{-1} \sum_{i=1}^n y_i^\top \theta^*)^2 = (n^{-1} \sum_{i=1}^n z_i)^2.$$

Since  $|z_i| \leq \|\theta^*\|_\infty = \sqrt{\pi_{\max}/\pi_{\min}}$ , by Hoeffding's inequality for  $\varepsilon > 0$

$$\mathbb{P}\left(\left|n^{-1} \sum_{i=1}^n z_i\right|^2 > \varepsilon\right) = \mathbb{P}\left(\left|n^{-1} \sum_{i=1}^n z_i\right| > \sqrt{\varepsilon}\right) \leq 2\exp(-n\varepsilon/\|\theta^*\|_\infty).$$

$\square$

**Lemma 8.** *Let Assumptions 1 and 2 be true, and suppose that  $\{f_1, \dots, f_M\}$  is an  $L^2(T_x)$   $\varepsilon$ -net of  $\mathcal{H}_\tau$  and that  $\{\beta_1, \dots, \beta_K\}$  be an  $\varepsilon$ -net of  $I_\tau$ . Then for any admissible  $f$  and  $\beta$ , let  $f_j$  and  $\beta_\ell$  be members of the  $\varepsilon$ -nets so that  $\|f - f_j\|_{L^2(T_x)} < \varepsilon$  and  $|\beta - \beta_\ell| < \varepsilon$ . Then*

$$\left|\tilde{R}_{emp}(f, \beta) - \tilde{R}_{emp}(f_j, \beta_\ell)\right| \leq 8\varepsilon\left(\|\theta^*\|_\infty + \kappa\tau\right). \quad (\text{S3.2})$$

*Proof of Lemma 8.* By the reproducing property of  $\mathcal{H}$ ,  $\langle \Phi(x_i), f \rangle_{\mathcal{H}} = f(x_i)$ , and

$$\begin{aligned} \left|\tilde{R}_{emp}(f, \beta) - \tilde{R}_{emp}(f_j, \beta_\ell)\right| &= \left|\frac{1}{n} \sum_{i=1}^n |y_i^\top \theta^* - \beta - \langle \Phi(x_i), f \rangle_{\mathcal{H}}|^2 - \frac{1}{n} \sum_{i=1}^n |y_i^\top \theta^* - \beta_\ell - \langle \Phi(x_i), f_j \rangle_{\mathcal{H}}|^2\right| \\ &= \left|\frac{1}{n} \sum_{i=1}^n |y_i^\top \theta^* - \beta - f(x_i)|^2 - \frac{1}{n} \sum_{i=1}^n |y_i^\top \theta^* - \beta_\ell - f_j(x_i)|^2\right| \\ &= \left| -2\frac{1}{n} \sum_{i=1}^n y_i^\top \theta^* \{\beta + f(x_i) - \beta_\ell - f_j(x_i)\} + \frac{1}{n} \sum_{i=1}^n [\{\beta + f(x_i)\}^2 - \{\beta_\ell + f_j(x_i)\}^2] \right| \\ &\leq \underbrace{2\|\theta^*\|_\infty \left| \beta - \beta_\ell + \frac{1}{n} \sum_{i=1}^n \{f(x_i) - f_j(x_i)\} \right|}_{I_1} + \underbrace{\left| \frac{1}{n} \sum_{i=1}^n [\{\beta + f(x_i)\}^2 - \{\beta_\ell + f_j(x_i)\}^2] \right|}_{I_2}. \end{aligned}$$

Consider

$$\begin{aligned} I_1 &= 2\|\theta^*\|_\infty \left| \beta - \beta_\ell + \frac{1}{n} \sum_{i=1}^n \{f(x_i) - f_j(x_i)\} \right| \leq 2\|\theta^*\|_\infty \left\{ |\beta - \beta_\ell| + \frac{1}{n} \sum_{i=1}^n |f(x_i) - f_j(x_i)| \right\} \\ &\leq 2\|\theta^*\|_\infty \left\{ \varepsilon + \left[ \frac{1}{n} \sum_{i=1}^n |f(x_i) - f_j(x_i)|^2 \right]^{1/2} \right\} \\ &\leq 4\|\theta^*\|_\infty \varepsilon, \end{aligned}$$

where we used  $n^{-1} \sum_{i=1}^n [|f(x_i) - f_j(x_i)|^2]^{1/2} \leq [n^{-1} \sum_{i=1}^n |f(x_i) - f_j(x_i)|^2]^{1/2}$  due to Jensen’s inequality, and that  $\|f - f_j\|_{L^2(T_x)} < \varepsilon$  and  $|\beta - \beta_\ell| < \varepsilon$ .

Consider  $I_2$ . Using  $a^2 - b^2 = (a + b)(a - b)$ , the Cauchy-Schwarz inequality, and Jensen’s inequality,

$$\begin{aligned} I_2 &= \frac{1}{n} \left| \sum_{i=1}^n \{\beta + f(x_i) + \beta_\ell + f_j(x_i)\} \{\beta - \beta_\ell + f(x_i) - f_j(x_i)\} \right| \\ &\leq 2 \left( \sup_{\beta \in I_\tau} |\beta| + \sup_{x, f \in \mathcal{H}_\tau} |f(x)| \right) \frac{1}{n} \sum_{i=1}^n (|\beta - \beta_\ell| + |f(x_i) - f_j(x_i)|) \\ &\leq 2(\|\theta^*\|_\infty + \kappa\tau + \sup_{x, f \in \mathcal{H}_\tau} |\langle \Phi(x), f \rangle_{\mathcal{H}}|)(\varepsilon + \frac{1}{n} \sum_{i=1}^n |f(x_i) - f_j(x_i)|) \\ &\leq 2 \left( \|\theta^*\|_\infty + \kappa\tau + \kappa\tau \right) \left( \varepsilon + \sqrt{\frac{1}{n} \sum_{i=1}^n |f(x_i) - f_j(x_i)|^2} \right) \\ &= 4\varepsilon \left( \|\theta^*\|_\infty + 2\kappa\tau \right). \end{aligned}$$

Combining the bounds for  $I_1$  and  $I_2$  completes the proof of Lemma 8.  $\square$

**Lemma 9.** *Let  $\{(x_i, y_i)\}_{i=1}^{2n}$  be the data, and consider an  $L^2(T_x)$   $\varepsilon$ -net  $\{f_1, \dots, f_M\}$  of  $\mathcal{H}_\tau$ . Then  $\{f_1, \dots, f_M\}$  is an  $\sqrt{2}\varepsilon$ -net with respect to the empirical measure on half of the data  $\{(x_i, y_i)\}_{i=1}^n$ .*

*Proof of Lemma 9.* Since  $\{f_1, \dots, f_M\}$  is  $\varepsilon$ -net with respect to  $\{(x_i, y_i)\}_{i=1}^{2n}$ , for any  $f \in \mathcal{H}_\tau$ , there exists  $f_j$  such that

$$\sqrt{\frac{1}{2n} \sum_{i=1}^{2n} |f(x_i) - f_j(x_i)|^2} < \varepsilon.$$

If  $\frac{1}{2n} \sum_{i=1}^{2n} |f(x_i) - f_j(x_i)|^2 = 0$ , then  $\frac{1}{n} \sum_{i=1}^n |f(x_i) - f_j(x_i)|^2 = 0$ . Otherwise

$$\begin{aligned} \sqrt{\frac{1}{n} \sum_{i=1}^n |f(x_i) - f_j(x_i)|^2} &= \sqrt{\frac{2n}{2n} \frac{1}{n} \sum_{i=1}^n |f(x_i) - f_j(x_i)|^2 \frac{\sum_{i=1}^{2n} |f(x_i) - f_j(x_i)|^2}{\sum_{i=1}^{2n} |f(x_i) - f_j(x_i)|^2}} \\ &= \sqrt{\frac{2n \sum_{i=1}^n |f(x_i) - f_j(x_i)|^2}{n \sum_{i=1}^{2n} |f(x_i) - f_j(x_i)|^2}} \sqrt{\frac{1}{2n} \sum_{i=1}^{2n} |f(x_i) - f_j(x_i)|^2} < \sqrt{2}\varepsilon, \end{aligned}$$

hence  $\{f_1, \dots, f_M\}$  is  $\sqrt{2}\varepsilon$ -net with respect to  $\{(x_i, y_i)\}_{i=1}^n$ .  $\square$

**Lemma 10** (Theorem 2.1 of [3]). *Let Assumption 3 be true, and Let  $M(Z)$  be the size of an  $L^2(T_x)$   $\varepsilon$ -covering number of  $\mathcal{H}_\tau$  with data  $Z = \{(x_i, y_i)\}_{i=1}^n$ . There exists a  $C > 0$  independent of  $n$ , such that*

$$\sup_{Z=\{(x_i, y_i)\}_{i=1}^n} M(Z) \leq \exp\left(\frac{C\tau^2}{\varepsilon^2}\right). \quad (\text{S3.3})$$

**Remark 2.** [4] notes that “Theorem 2.1 of [3] considered only the Gaussian RKHS, however the proof of the entropy bound for  $p = 2$  in their notation only requires that the RKHS is separable.” It is this case which is presented in Lemma 10.

## References

- [1] Olivier Bousquet, Stéphane Boucheron, and Gábor Lugosi. Introduction to statistical learning theory. In *Advanced lectures on machine learning*, pages 169–207. Springer, 2004.
- [2] Irina Gaynanova and Tianying Wang. Sparse quadratic classification rules via linear dimension reduction. *arXiv preprint arXiv:1711.04817*, 2017.

- [3] Ingo Steinwart and Clint Scovel. Fast rates for support vector machines using gaussian kernels. *The Annals of Statistics*, pages 575–607, 2007.
- [4] Chong Zhang, Yufeng Liu, and Yichao Wu. On quantile regression in reproducing kernel hilbert spaces with data sparsity constraint. *Journal of Machine Learning Research*, 17(40):1–45, 2016.
